# 1 Native molecule sequencing by nano-ID reveals synthesis and stability of RNA isoforms

2 Kerstin C. Maier<sup>†1</sup>, Saskia Gressel<sup>1</sup>, Patrick Cramer<sup>1\*</sup>, and Björn Schwalb<sup>1†\*</sup>

3 <sup>1</sup>Max-Planck-Institute for Biophysical Chemistry, Department of Molecular Biology, Am  
4 Faßberg 11, 37077 Göttingen, Germany.

5 <sup>†</sup>These authors contributed equally.

6 \*Correspondence to: Patrick Cramer, ([patrick.cramer@mpibpc.mpg.de](mailto:patrick.cramer@mpibpc.mpg.de)), and Björn Schwalb,  
7 ([bjoern.schwalb@mpibpc.mpg.de](mailto:bjoern.schwalb@mpibpc.mpg.de)).

8

## 9 **Abstract**

10 Eukaryotic genes often generate a variety of RNA isoforms that can lead to functionally distinct  
11 protein variants. The synthesis and stability of RNA isoforms is however poorly characterized.  
12 The reason for this is that current methods to quantify RNA metabolism use ‘short-read’  
13 sequencing that cannot detect RNA isoforms. Here we present nanopore sequencing-based  
14 Isoform Dynamics (nano-ID), a method that detects newly synthesized RNA isoforms and  
15 monitors isoform metabolism. nano-ID combines metabolic RNA labeling, ‘long-read’ nanopore  
16 sequencing of native RNA molecules and machine learning. Application of nano-ID to the heat  
17 shock response in human cells reveals that many RNA isoforms change their synthesis rate,  
18 stability, and splicing pattern. nano-ID also shows that the metabolism of individual RNA  
19 isoforms differs strongly from that estimated for the combined RNA signal at a specific gene  
20 locus. And although combined RNA stability correlates with poly(A)-tail length, individual RNA  
21 isoforms can deviate significantly. nano-ID enables studies of RNA metabolism on the level of  
22 single RNA molecules and isoforms in different cell states and conditions.

23

24

## 25 **Main**

26 In metazoan cells, a single gene locus can give rise to a variety of different RNA molecules that  
27 are generally referred to as isoforms. These RNA isoforms can differ in their 5'- and 3'-ends that  
28 arise from the use of different transcription start sites and polyadenylation sites, respectively <sup>1-4</sup>.  
29 In addition, alternative splicing results in RNA isoforms that differ in the composition of their  
30 RNA body <sup>5,6</sup>. Different mRNA isoforms can result in functionally different proteins.  
31 Vulnerabilities in splicing can lead to non-functional protein products. Diseases have been linked  
32 to alternative splicing, which can generate malignant RNA isoforms <sup>7</sup>. Duchenne muscular  
33 dystrophy (DMD), for example, can be pinpointed to a single gene encoding the protein  
34 dystrophin. The underlying malignant RNA isoform exhibits a different splicing pattern and  
35 leads to a non-functional protein, which disrupts muscular cell integrity <sup>8</sup>. Likewise, the three  
36 most common types of breast tumors are linked to exon skipping and intron retention <sup>9</sup>.

37 RNA isoforms can also differ in their stability. The untranslated region of an RNA  
38 isoform can differ in length and contains regulatory elements <sup>10</sup>. The length of the poly(A)-tail at  
39 the 3'-end of RNA isoforms can also differ and influence RNA stability <sup>11,12</sup>, and this is relevant  
40 for disease as well <sup>13</sup>. Finally, introns may be retained in RNAs and can influence stability <sup>14</sup>.

41 Little is known however about the synthesis and stability of single RNA isoforms in cells.  
42 This is because the systematic characterization of RNA isoforms and their metabolism is  
43 technically difficult. In particular, the detection, quantification and estimation of the stability of  
44 RNA isoforms is essentially impossible with 'short-read' RNA sequencing methods because  
45 reads generally cannot be assigned to RNA isoforms. Also, alternative splicing patterns can be  
46 manifold and are difficult to identify using 'short-read' sequencing approaches <sup>15</sup>. Finally,  
47 although the length of poly(A)-tails of RNAs can be measured genome-wide <sup>16,17</sup>, they can  
48 currently not be obtained at the level of individual RNA isoforms.

49 The architecture of RNA isoforms has been addressed so far by 'short-read' RNA  
50 sequencing approaches such as DARTS <sup>18</sup>, VastDB <sup>19</sup> and MPE-seq <sup>20</sup> to study alternative  
51 splicing or TIF-seq <sup>1,3</sup> to elucidate combinations of paired 5'- and 3'-ends of individual RNAs.  
52 More recent approaches include 'long-read' sequencing approaches on the PacBio SMRT  
53 Sequencing platform <sup>6</sup> or Oxford Nanopore Technologies nanopore sequencing platform <sup>5,21,22</sup>.

54 These methods however are not able to study the metabolism of individual RNA isoforms  
55 because they lack the ability to assign age to single reads.

56 Methods to measure the synthesis and stability of combined RNA for entire gene loci are  
57 available <sup>23-25</sup>. Transient transcriptome sequencing (TT-seq) is a protocol that allows to  
58 distinguish newly synthesized from pre-existing RNA in human cells <sup>26</sup>. TT-seq involves a brief  
59 exposure of cells to the nucleoside analogue 4-thiouridine (4sU). 4sU is incorporated into RNA  
60 during transcription, and the resulting 4sU-labeled RNA can be purified and sequenced to  
61 provide a snapshot of immediate transcription activity. This then enables to computationally  
62 infer RNA synthesis and stability at the level of the combined RNA signal from a gene locus.

63 Recent methods to assess RNA stability include SLAM-seq <sup>27</sup> and TimeLapse-seq <sup>28</sup>.  
64 Like TT-seq, SLAM-seq and TimeLapse-seq involve an exposure of cells to 4sU for labeling of  
65 newly synthesized RNA. A chemical modification of the incorporated 4sU then allows for the  
66 identification of labeled RNA *in silico* without the need for purification. All of these methods,  
67 however, have limitations. First, sequencing reads can normally only be assigned to entire gene  
68 loci and not to RNA isoforms and thus only allow a combined RNA stability assessment.  
69 Second, they require template amplification, which can lead to an imbalance in measured  
70 sequences and information loss, e.g. modified RNA bases <sup>29</sup>. Third, labeled RNA purification  
71 (TT-seq) and cDNA library preparation (TT-seq, SLAM-seq & TimeLapse-seq) can also  
72 introduce biases.

73 Therefore, monitoring RNA metabolism at the level of RNA isoforms requires a method  
74 that can detect individual RNA molecules. Recent advances in ‘long-read’ nanopore sequencing  
75 indeed enable the sequencing of single, full-length RNA molecules <sup>5</sup>. Nanopore technology can  
76 directly sequence the original native RNA molecule with its modifications, may they be natural  
77 or acquired by metabolic RNA labeling. Moreover, the availability of the entire RNA and coding  
78 sequence (CDS) within a single read allows to unambiguously and directly determine exon usage  
79 <sup>30</sup>. Direct RNA ‘long-read’ nanopore sequencing also has the potential to detect the position and  
80 length of the poly(A)-tail along with each single isoform.

81 Here we developed nanopore sequencing-based Isoform Dynamics (nano-ID), which  
82 combines metabolic RNA labeling with native RNA ‘long-read’ nanopore sequencing for RNA  
83 isoform detection. In combination with computational modeling and machine learning this

84 allows for a full characterization of RNA isoforms dynamics. nano-ID can identify and quantify  
85 RNA isoforms along with their synthesis rate, stability and poly(A)-tail length in the human  
86 myelogenous leukemia cell line K562. We show that this is possible with nano-ID in a  
87 quantitative manner in steady state and also during the transcriptional response to heat shock.  
88 nano-ID is able to resolve the dynamic metabolism of RNA isoforms upon heat shock and  
89 demonstrates the need for individual RNA isoform assessment. Taken together, nano-ID can be  
90 used to elucidate a largely unexplored complex layer of gene regulation at the level of single  
91 native RNA isoforms and their metabolism.

92

## 93 **Results**

### 94 **Experimental design**

95 To monitor the metabolism of RNAs at the level of single isoforms, we sought to combine  
96 metabolic RNA labeling with direct, single-molecule RNA nanopore sequencing (**Figure 1a**). By  
97 culturing cells in the presence of a nucleoside analogue, cells will take up and incorporate the  
98 analogue in nascent RNA during transcription, allowing to distinguish newly synthesized RNA  
99 isoforms from pre-existing RNA isoforms *in silico* based on the quantification of analogue-  
100 containing subpopulations. This will allow to infer the synthesis rate and stability of single RNA  
101 isoforms. In order to dynamically characterize functional and fully processed RNA transcripts,  
102 we decided to measure poly-adenylated RNA species. The library preparation kit offered by  
103 Oxford Nanopore Technologies for direct RNA sequencing (SQK-RNA001) is specifically  
104 optimized for this purpose. A 3' poly(A)-tail specific adapter is ligated to the transcript in a first  
105 step. Then a second sequencing adapter equipped with a motor protein is ligated to the first  
106 adapter. The preparation of RNA libraries from biological samples for direct RNA nanopore  
107 sequencing is established and can be carried out within 2h<sup>31</sup>. Major challenges that we faced  
108 were however the search of a suited nucleoside analogue for RNA labeling and the detection of  
109 labeled RNA isoforms, provided that the labeling efficiency is known to be limited to about 2-  
110 3%, i.e. only two or three out of 100 natural nucleotides are replaced by the analogue<sup>32</sup>.

111

### 112 **5-Ethynyluridine (<sup>5E</sup>U) can be detected in RNA by nanopore sequencing**

113 To investigate if nucleoside analogues incorporated into RNA are detectable in the nanopore, we  
114 used synthetic RNAs derived from the ERCC RNA spike-in mix (Life Technologies). These  
115 synthetic RNAs of an approximate length of 1,000 nucleotides were chosen with similar U  
116 content (**Supplementary Table 3**). RNAs were transcribed *in vitro* using either the standard  
117 bases A, U, C, G as a control, or with one of the natural bases exchanged for a nucleoside  
118 analogue (**Figure 1b, Methods**). Subsequently, we subjected these synthetic RNAs to direct  
119 RNA nanopore sequencing (**Supplementary Figure 1a-b**). We compared the nucleoside  
120 analogues 5-Ethynyluridine (<sup>5E</sup>U), 5-bromouridine (<sup>5Br</sup>U), 5-iodouridine (<sup>5I</sup>U), 4-thiouridine (<sup>4S</sup>U)  
121 and 6-thioguanine (<sup>6S</sup>G). To this end we used the base-called and mapped direct RNA sequencing  
122 results to calculate how probable the identification would be on the level of single nucleotides. In  
123 particular, we compared the error rate in single nucleotide base-calls of nucleoside analogues to  
124 that of natural U or G (**Figure 1c, Methods**).

125 The thiol-based analogues, <sup>4S</sup>U and <sup>6S</sup>G, showed lower incorporation efficiencies during  
126 *in vitro* transcription (IVT) and led to blockages during nanopore sequencing. <sup>5E</sup>U and <sup>5I</sup>U could  
127 be detected to a similar extent by nanopore sequencing, whereas <sup>5Br</sup>U was less easily recognized  
128 (**Figure 1c**). Since <sup>5E</sup>U is not toxic to cells<sup>32-34</sup>, we used <sup>5E</sup>U for a more detailed analysis.  
129 Approximately 50% of all U positions in <sup>5E</sup>U-containing synthetic RNAs are consistently  
130 miscalled by the standard base-calling algorithm and can thus be discerned from U (**Figure 1d**,  
131 **Supplementary Figure 1b**). This is clearly visible in the raw data. Aberrations caused by  
132 stretches of RNA containing <sup>5E</sup>U are distinguishable from stretches of RNA containing the  
133 naturally occurring U in the nanopore (**Figure 1d**). Taken together, <sup>5E</sup>U-based RNA labeling is  
134 well suited for nanopore sequencing.

135

### 136 **Detection and sequencing of newly synthesized RNA isoforms**

137 We next investigated whether it is possible to use metabolic RNA labeling with <sup>5E</sup>U in human  
138 cells to detect single RNA molecules by nanopore sequencing. Calculations on the direct RNA  
139 nanopore sequencing results of the <sup>5E</sup>U-containing synthetic RNAs showed that RNAs are  
140 recognizable as <sup>5E</sup>U containing with a probability of 0.9 when a minimum length of 500  
141 nucleotides is reached (**Supplementary Figure 1c-d**). This covers the vast majority (93%) of all  
142 mature RNAs in the human organism (UCSC RefSeq GRCh38).

143 We then established direct RNA nanopore sequencing in the human myelogenous  
144 leukemia cell line K562. We cultured K562 cells in the presence of <sup>5E</sup>U for 60 minutes (<sup>5E</sup>U 60  
145 min) in 4 biological replicates (**Methods**). For comparison, we created 3 biological replicates  
146 exposed to <sup>5E</sup>U labeling for 24 h (<sup>5E</sup>U 24 h) and 3 biological replicates that were not labeled  
147 (Control). After standard base-calling, we could map reads to support 13,110 RefSeq annotated  
148 transcription units (RefSeq-TUs, **Methods**), 8,098 of these were supported in all conditions and  
149 1,726 were supported in all samples.

150 All combined samples were then used to perform a full-length alternative RNA isoform  
151 analysis by means of the FLAIR algorithm<sup>22</sup>. This allows defining instances of unique exon-  
152 intron architecture with unique start and end sites in human K562 cells. Raw human direct RNA  
153 nanopore reads were corrected with the use of short-read sequencing data (RNA-seq) to increase  
154 splice site accuracy. We could detect 33,199 distinct RNA isoforms with an average of 3  
155 isoforms per gene. This shows that direct RNA nanopore sequencing uncovers individual RNA  
156 isoforms in human K562 cells (**Figure 2**) with high reproducibility (**Supplementary Figure 2**).

157

### 158 **A neural network identifies newly synthesized RNA isoforms**

159 The next step was to derive a computational method that could classify each sequenced RNA  
160 molecule into one of two groups, newly synthesized (<sup>5E</sup>U-labeled) or pre-existing (unlabeled)  
161 RNA. To this end, the nucleoside analogue <sup>5E</sup>U had to be detected in RNA molecules. This  
162 would allow the quantification of RNA isoforms generated during the <sup>5E</sup>U labeling pulse. Due to  
163 the high error rate of nanopore sequencing, a single <sup>5E</sup>U base-call is inappropriate as an indicator.  
164 We rather used the raw signal of the entire RNA nanopore read, including the base-calls and the  
165 alignment, to discriminate labeled from unlabeled RNAs. This discrimination was implemented  
166 as a classifying neural network. We developed a custom multi-layered data collection scheme to  
167 train a neural network for the classification of human RNA isoforms under the assumption that  
168 the <sup>5E</sup>U 24 h samples solely contain labeled reads and the fact that the Control samples solely  
169 contain unlabeled reads (**Figure 3a, Methods**).

170 We then trained a neural network (**Methods**) on the <sup>5E</sup>U 24 h versus Control samples  
171 with an accuracy of 0.87 and a false discovery rate (FDR) of 0.025 (5-fold cross-validated). A  
172 ROC analysis (1 – specificity versus sensitivity) for all reads of the test set showed an area under

173 the curve (AUC) of 0.94. For reads with an alignment length larger than 500 nt and 1,000 nt the  
174 AUC improved to 0.96 (**Figure 3b, Supplementary Figure 3a, b**). Subsequently we used the  
175 trained neural network to classify reads of the <sup>5E</sup>U 60 min samples into <sup>5E</sup>U-labeled and  
176 unlabeled. Taken together, <sup>5E</sup>U containing RNA isoforms are computationally detectable with  
177 high accuracy (**Figure 3c**). For validation purposes, we used another machine learning approach.  
178 We trained a random forest on the same data, which yielded similar results (**Supplementary**  
179 **Figure 3c, d**). Thus, we were able to determine for each single RNA molecule if it has been  
180 produced during <sup>5E</sup>U labeling or before, with a low false discovery rate (**Figure 3c**).

181

### 182 **nano-ID provides the stability and poly(A) tail length of RNA isoforms**

183 The ability to distinguish newly synthesized and pre-existing RNA molecules allowed us to  
184 derive estimates for the stability of RNA isoforms. For each single direct RNA nanopore read we  
185 were able to assign the RNA isoform it reflects. Additionally, we were able to assess the stability  
186 of RNA for single RNA isoforms by applying a first-order kinetic model (**Methods,**  
187 **Supplementary Figure 3e-f**) to derive estimates for RNA isoform specific synthesis and  
188 stability. This can be done based on the number of reads classified as <sup>5E</sup>U-labeled and unlabeled  
189 by the neural network. Taken together, nano-ID has the capability to infer synthesis and stability  
190 of individual RNA isoforms in different cell states and conditions, and thus to monitor their  
191 dynamic metabolism.

192 Moreover, we developed an algorithm to determine poly(A)-tail lengths for each RNA  
193 isoform (**Figure 4**). This is possible by estimating the dwell time of the poly(A)-tail in the  
194 nanopore by factoring in the measurement frequency in kHz and the speed of RNA translocation  
195 through the nanopore (**Methods**). Sequencing adaptor ligation in the direct RNA nanopore  
196 sequencing library preparation guarantees full-length poly(A)-tails because ligation of the  
197 adapter would not be successful otherwise. The resulting poly(A)-tail length distribution is in  
198 line with the current literature<sup>16</sup> (**Figure 4a**) and reveals a pattern that likely corresponds to the  
199 26 nucleotide footprint of the poly(A) binding protein (**Supplementary Figure 4a**)<sup>35</sup>. The direct  
200 RNA nanopore sequencing kit contains the so-called RNA calibration strand (RCS). The RCS is  
201 a synthetic RNA with a poly(A)-tail of exactly 30 adenines. Using the RCS of the direct RNA  
202 nanopore sequencing kit, we could assess the accuracy of the poly(A)-tail length estimates



203 (coefficient of variation 0.63). Our algorithm derives this length for the added RCS  
204 subpopulation (**Figure 4b**). Taken together, nano-ID reveals the synthesis, stability, and poly(A)  
205 tail length for individual RNA isoforms in human cells.

206

### 207 **nano-ID monitors RNA isoform dynamics during heat shock**

208 To demonstrate the advantages of nano-ID, we subjected human K562 cells to heat shock (42  
209 °C) for 60 min in the presence of <sup>5E</sup>U (<sup>5E</sup>U 60 min HS) (**Figure 5a**). The heat shock response  
210 provides a well-established model system<sup>36-41</sup> (**Supplementary Figure 5**). We first asked  
211 whether RNA isoforms do retain more introns after heat shock as this was shown in the mouse  
212 system<sup>42</sup>. Indeed, we observed widespread intron retention which significantly increased upon  
213 heat shock (**Figure 5b**). Although intron retention generally influences the stability of an RNA, it  
214 does not explain changes in RNA isoform stability upon heat shock (**Figure 5c**). This finding is  
215 consistent with the idea that specific RNA elements occurring only in specific RNA isoforms  
216 influence RNA stability.

217 We next asked if RNA isoform synthesis is altered by heat shock and observed  
218 significant differential RNA isoform synthesis for 285 isoforms (fold change > 1.25 and p-value  
219 < 0.1). 187 RNA isoforms were significantly upregulated, while 98 were downregulated (**Figure**  
220 **5d**). RNA isoforms that changed their synthesis during heat shock were also observed to alter  
221 their stability (**Figure 5e-f**). In particular, RNA isoforms that were upregulated in their synthesis  
222 during heat shock also showed a lower stability, and the other way around, resembling typical  
223 stress response behavior<sup>24</sup>. The destabilization of upregulated RNA isoforms is likely to ensure  
224 their rapid removal toward the end of the stress response. Similarly, downregulated RNA  
225 isoforms are stabilized, perhaps to preserve them for translation at later stages.

226

### 227 **nano-ID reveals the biogenesis of RNA isoforms**

228 Although standard native RNA isoform sequencing can reveal isoforms present in a sample after  
229 perturbation, it cannot distinguish whether these isoforms were derived by synthesis, stability,  
230 splicing, or any combination of these. nano-ID however is able to disentangle these parameters.  
231 For example, although we observe a general increase in intron retention upon heat shock, we find



232 exceptions at the level of RNA isoforms. This can be clearly seen at the human C1orf63 gene  
233 locus (**Supplementary Figure 5g**). Here, the majority of reads, that retain the entire 3<sup>rd</sup> intron,  
234 were newly synthesized in the control samples. It is however unclear if this intron will be  
235 retained throughout the existence of these RNA molecules. Investigation of the same gene locus  
236 upon heat shock showed that the vast majority of reads were pre-existing RNAs. This indicates  
237 that this RNA is not transcribed anymore upon heat shock and allows for the conclusion that  
238 intron retention is not altered, rather, less introns are seen retained when only old RNA is  
239 detected. Taken together, this shows that nano-ID is able to resolve the dynamic behavior of  
240 RNA isoforms upon stimuli that could not be seen otherwise. It demonstrates the need for  
241 individual RNA isoform detection and classification into newly synthesized and pre-existing  
242 molecules. By providing information on the age of RNA molecules, nano-ID enables an analysis  
243 of the biogenesis of RNA isoforms.

244

#### 245 **The metabolism of individual RNA isoforms differs from combined RNA estimates**

246 To demonstrate the importance of individual RNA isoform assessment, we first derived  
247 estimates for the half-lives of combined RNAs that stem from entire gene loci under steady state  
248 conditions (**Methods, Supplementary Figure 3e-f**). We found a robust correlation of combined  
249 RNA stability with poly(A)-tail length (Spearman's rank correlation coefficient 0.48) (**Figure**  
250 **5g**). We now asked whether changes in RNA stability would also be reflected in changes in  
251 poly(A)-tail length upon heat shock, and this was not the case (**Figure 5h**). Instead, we found  
252 genes that showed the opposite behavior to the overall correlation as demonstrated for the human  
253 HSPB1 locus (**Figure 6a-b**). Here, destabilization of combined RNAs is accompanied by  
254 lengthening of the poly(A)-tail. This view changes dramatically when considering individual  
255 RNA isoforms (**Figure 6c**). For those three RNA isoforms at the human HSPB1 gene locus for  
256 which stability estimates were supported by all 3 biological replicates (**Methods**) we found that  
257 poly(A)-tails were generally longer. RNA stability however was decreased for 2 out of the 3  
258 RNA isoforms and increased for the third. This clearly indicates the need for detailed individual  
259 RNA isoform assessment as individual RNA isoforms can lead to functionally distinct protein  
260 variants. Thus, it is crucial to also study the behavior of individual RNA isoforms instead of  
261 breaking it down to the combined view of the entire gene locus.

262 As a second example, we picked RNA isoforms at the human TAGLN2 gene locus  
263 (**Figure 6d**). We could identify 7 different RNA isoforms and reliably calculate RNA stability  
264 for 6 RNA isoforms. Two of them were stabilized upon heat shock, 4 of them were destabilized.  
265 All 4 destabilized RNA isoforms include the second to last exon, which might cause this change  
266 in stability. RNA isoform 7 is an exception to this observation as it is stabilized upon heat shock.  
267 It, however, also contains a 3' UTR that is 42 bases shorter than all the other RNA isoforms. We  
268 asked whether there is differential behavior of individual RNA isoforms genome-wide or if RNA  
269 isoforms generally reflect the changes in stability of the combined RNA from their respective  
270 gene loci. To that end, we compared RNA stability estimates of individual RNA isoforms to  
271 those from combined RNAs and found that the dynamics of individual RNA isoform during heat  
272 shock varies globally (**Figure 6e, Supplementary Figure 6**). Taken together, this shows that  
273 conclusions can be misleading when combined RNAs are used and how much can be learned on  
274 the level of single RNA isoforms by using nano-ID.

275

## 276 **Discussion**

277 Here we develop nano-ID, a method that allows for dynamic characterization of functional and  
278 fully processed RNA isoforms on the level of single native RNA molecules. nano-ID combines  
279 metabolic RNA labeling with native RNA nanopore sequencing to enable RNA isoform  
280 identification, estimation of its stability, and a measurement of its poly(A)-tail length from a  
281 single sample. nano-ID is able to visualize changes in RNA isoform synthesis and stability and  
282 reveals a hidden layer of gene regulation. nano-ID thus allows to study transcriptional regulation  
283 in unprecedented detail and can prevent misleading conclusions that would be obtained when  
284 only combined RNAs from an entire gene locus are considered, as is done by RNA-seq, 4sU-seq  
285 or TT-seq.

286 nano-ID has many advantages over other sequencing-based transcriptomic strategies as it  
287 allows to sequence the original native RNA molecule. In particular, there is no need for  
288 fragmentation of RNA prior to sequencing and hence no ambiguity in assigning reads to RNA  
289 isoforms. nano-ID also does not require template amplification and thus omits copying errors and  
290 sequence-dependent biases. It comes without a lengthy library protocol and eliminates  
291 sequencing by synthesis and therefore prevents loss of information on epigenetic modifications  
292 and artificially introduced RNA base analogues. It is PCR-free and shows neither sequence bias

293 nor read duplication events. Taken together, it overcomes drawbacks and limitations of state-of-  
294 the-art approaches and increases the gathered information vastly.

295         Generally, nanopore sequencing has still limitations in throughput and accuracy. These  
296 drawbacks, however, are outweighed by the information obtained on the sequencing substrates.  
297 The longer the sequenced molecules are, the less problematic is the lack in accuracy in  
298 identifying their origin or classifying it into newly-synthesized or pre-existing. On top of that,  
299 there are strategies to improve splice site calling with already existing high accuracy ‘short-read’  
300 sequencing data to reduce sequencing errors or to assess the likelihood of real nucleotide  
301 variants. We can however show that our algorithmic strategies are already sufficient to address  
302 metabolic rate estimation in a reliable manner. Technical improvements in nanopore sequencing  
303 or their computational processing will strongly improve the accuracy of individual read  
304 sequences and thus detectability of <sup>5E</sup>U. The task at hand will be the development of a novel  
305 base-calling algorithm for direct RNA nanopore sequencing with extended base alphabet (A, C,  
306 G, U & <sup>5E</sup>U). Furthermore, increased throughput will foster statistical precision of metabolic rate  
307 estimation and will also allow to elucidate low abundant or transient processes.

308         Nanopore-based transcriptomic studies will allow us to monitor the formation of  
309 transcripts, post-transcriptional processing, export and translation at the level of single RNA  
310 isoforms. nano-ID is in principle also transferable to single cell methodologies, to catch  
311 heterogeneity of the RNA population in any state of the cell. This however requires sequencing  
312 library preparation with lower input amounts. The use of <sup>5E</sup>U is widely established for *in vivo*  
313 applications in the field such as fluorescence microscopy. We thus envision that nano-ID is in  
314 principle applicable to many types of organisms, cells and conditions.

315

316

## 317 **Methods**

318

319 **Labeling and direct RNA nanopore sequencing of synthetic RNAs.** Labeled synthetic RNAs  
320 and synthetic control RNAs are derived from selected RNAs of the ERCC RNA Spike-in Mix  
321 (Ambion) as described in <sup>26</sup>. Characteristics of selected RNAs of the ERCC RNA Spike-in Mix  
322 are listed in (**Supplementary Table 3**). Briefly, selected spike-in sequences were cloned into a  
323 pUC19 cloning vector and verified by Sanger sequencing. For IVT template generation, the  
324 plasmid (3 µg) was linearized using EcoRV-HF (blunt end cut) digestion mix containing  
325 CutSmart buffer and EcoRV-HF enzyme. The digestion mix was incubated at 37 °C for 1 h and  
326 the reaction was terminated adding 1/20 volume of 0.5 M EDTA. Subsequently, DNA was  
327 precipitated in 1/10 volume of 3 M sodium acetate pH 5.2, and 2 volumes of 100 % ethanol at -  
328 20 °C for 15 min. DNA was collected by centrifugation at 4 °C and 16,000 x g for 15 min. The  
329 pellet was washed twice using 75 % ethanol. DNA was air-dried and resuspended in 5 µL of  
330 H<sub>2</sub>O at a concentration of 0.1-1.0 µg/µL (quantified by NanoDrop). Synthetic RNAs were *in*  
331 *vitro* transcribed using the MEGAscript T7 kit (Ambion). *In vitro* transcription (IVT) of  
332 synthetic control RNAs was performed following the manufacturer's instruction. For IVT of  
333 labeled synthetic RNAs, 100 % of UTP (resp. GTP) was substituted with either 5-ethynyl-UTP  
334 (<sup>5E</sup>U, Jena Bioscience), 5-bromo-UTP (<sup>5Br</sup>U, Sigma), 5-iodo-UTP (<sup>5I</sup>U, TriLink BioTechnologies  
335 LLC), 4-thio-UTP (<sup>4S</sup>U, Jena Bioscience) or 6-thio-GTP (<sup>6S</sup>G, Sigma). Note that, for performing  
336 a successful IVT with 4-thio-UTP and 6-thio-GTP, only a reduction to 80% substitution gave  
337 successful yield. IVT reactions were incubated at 37 °C. After 4 h, reaction volume was filled up  
338 with H<sub>2</sub>O to 40 µL, then 2 µL of TURBO DNase was added and incubated at 37 °C for  
339 additional 15 min. Synthetic RNAs were purified with RNAClean XP beads (Beckman Coulter)  
340 following the manufacturer's instructions. The final synthetic RNA pool contained equal mass of  
341 all respective synthetic RNAs in a given library (**Supplementary Table 1**). RNA was quantified  
342 using Qubit (Invitrogen). RNA quality was assessed with the TapeStation System (Agilent)  
343 Synthetic RNA pools were poly(A)-tailed using the *E. coli* Poly(A) Polymerase (NEB). The  
344 reaction was incubated for 5 min and stopped with 0.1 M EDTA. Spike-ins were then purified  
345 with phenol:chloroform:isoamyl alcohol and precipitated. Poly(A)-tailed synthetic RNA pools  
346 were subsequently subjected to direct RNA nanopore sequencing library preparation (SQK-  
347 RNA001, Oxford Nanopore Technologies) following manufacturer's protocol. All libraries were

348 sequenced on a MinION Mk1B (MIN-101B) for 20 h, unless reads sequenced per second  
349 stagnated dramatically.

350

351 **Culturing of human K562 cells.** Human K562 erythroleukemia cells were obtained from  
352 DSMZ (Cat. # ACC-10). K562 cells were cultured antibiotic-free in accordance with the DSMZ  
353 Cell Culture standards in RPMI 1640 medium (Thermo Fisher Scientific) containing 10 % heat  
354 inactivated fetal bovine serum (FBS) (Thermo Fisher Scientific), and 1x GlutaMAX supplement  
355 (Thermo Fisher Scientific) at 37 °C in a humidified 5 % CO<sub>2</sub> incubator. Cells used in this study  
356 display the phenotypic properties, including morphology and proliferation rate, that have been  
357 described in literature. Cells were verified to be free of mycoplasma contamination using PlasmO  
358 Test Mycoplasma Detection Kit (InvivoGen). Biological replicates were cultured independently.

359

360 **<sup>5</sup>E U labeling and direct RNA nanopore sequencing of human K562 cells.** K562 cells were  
361 kept at low passage numbers (<6) and at optimal densities (3x10<sup>5</sup> - 8x10<sup>5</sup>) during all  
362 experimental setups. Per biological replicate, K562 cells were diluted 24 h before the experiment  
363 was performed (**Supplementary Table 1**). Per <sup>5</sup>E U 60 min sample (4 replicates), cells were  
364 incubated at 37 °C, 5 % CO<sub>2</sub> for 1 h after a final concentration of 500 μM 5-Ethynyluridine (<sup>5</sup>E U,  
365 Jena Bioscience) was added. Per <sup>5</sup>E U 24 h sample (3 replicates), cells were incubated at 37 °C,  
366 5% CO<sub>2</sub> for 24 h. <sup>5</sup>E U was added 3 times during the 24h incubation, i.e. every 8 hours (0h, 8h,  
367 16h) at a final concentration of 500 μM. Control samples were not labeled (3 replicates). Per <sup>5</sup>E U  
368 60 min HS (heat shock) sample (3 replicates), cells were incubated at 42 °C for 5 min (until cell  
369 suspension reached 42 °C), and then <sup>5</sup>E U was added at a final concentration of 500 μM. Further,  
370 heat shock treatments were performed in a water bath (LAUDA, Aqualine AL12) at 42 °C. for 1  
371 h. Temperature was monitored by thermometer. To avoid transcriptional changes by freshly  
372 added growth medium, fresh growth medium was added ~24 h prior to heat shock treatments<sup>43</sup>.  
373 Exactly after the labeling duration, cells were centrifuged at 37 °C and 1,500 x g for 2 min. Total  
374 RNA was extracted from K562 cells using QIAzol (Quiagen) according to manufacturer's  
375 instructions. Poly(A) RNA was purified from 1 mg of total RNA using the μMACS mRNA  
376 Isolation Kit (Milteny Biotec) following the manufacturer's protocol. The quality of poly(A)  
377 RNA selection was assessed using the TapeStation System (Agilent). Poly(A) selected RNAs

378 were subsequently subjected to direct RNA nanopore sequencing library preparation (SQK-  
379 RNA001, Oxford Nanopore Technologies) following manufacturer's protocol with 1000 ng  
380 input. All libraries were sequenced on a MinION Mk1B (MIN-101B) for 48 h, unless reads  
381 sequenced per second stagnated dramatically.

382

383 **RNA-seq.** Two biological replicates of K562 cells were diluted 24 h before the experiment was  
384 performed. Per replicate,  $3.6 \times 10^7$  cells in growth medium were labeled at a final concentration  
385 of 500  $\mu$ M 4-thio-uracil (4sU, Sigma-Aldrich), and incubated at 37 °C, 5 % CO<sub>2</sub> for 5 min.  
386 Exactly after 5 min of labeling, cells were harvested at 37 °C and 1,500 x g for 2 min. Total  
387 RNA was extracted from K562 cells using QIAzol according to manufacturer's instructions  
388 except for the addition of 150 ng RNA spike-in mix<sup>26</sup> together with QIAzol. To isolate polyA  
389 RNA from 75  $\mu$ g of total RNA, two subsequent rounds of purification by Dynabeads  
390 Oligo (dT)<sub>25</sub> (invitrogen) were performed. Purification based on manufacturer's instructions was  
391 performed twice, using 1 mg of Dynabeads Oligo (dT)<sub>25</sub> beads for the first round and 0.5 mg for  
392 the second round of purification. The quality of polyadenylated RNA selection was assessed  
393 using RNA ScreenTape on a TapeStation (Agilent). Sequencing libraries were prepared using the  
394 NuGEN Ovation Universal RNA-seq kit according to manufacturer's instructions. Fragments  
395 were amplified by 10 cycles of PCR, and sequenced on an Illumina NextSeq 550 in paired-end  
396 mode with 75 bp read length.

397

398 **Direct RNA nanopore sequencing data preprocessing of synthetic RNAs.** Direct RNA  
399 nanopore sequencing reads were obtained for each of the samples (**Supplementary Table 1**).  
400 FAST5 files were base-called using Albacore 2.3.1 (Oxford Nanopore Technologies) with the  
401 following parameters: `read_fast5_basecaller.py -f FLO-MIN106 -k SQK-RNA001`. Direct RNA  
402 nanopore sequencing reads were mapped with GraphMap 0.5.2<sup>44</sup> to the synthetic RNA reference  
403 sequence with the following parameters: `graphmap align --value 1e-10`. Further data processing  
404 was carried out using the R/Bioconductor environment.

405

406 **Direct RNA nanopore sequencing data preprocessing of human K562 cells.** Direct RNA  
407 nanopore sequencing reads were obtained for each of the samples (**Supplementary Table 1**).  
408 FAST5 files were base-called using Albacore 2.3.1 (Oxford Nanopore Technologies) with the  
409 following parameters: `read_fast5_basecaller.py -f FLO-MIN106 -k SQK-RNA001`. Direct RNA  
410 nanopore sequencing reads were mapped with Minimap2 2.10<sup>45</sup> to the hg20/hg38 (GRCh38)  
411 genome assembly (Human Genome Reference Consortium) with the following parameters:  
412 `minimap2 -ax splice -k14 --secondary=no`. Samtools<sup>46</sup> was used to quality filter SAM files,  
413 whereby alignments with MAPQ smaller than 20 (`-q 20`) were skipped. Further data processing  
414 was carried out using the R/Bioconductor environment and custom python scripts.

415  
416 **Probability of <sup>5E</sup>U-labeled RNA isoform identification based on synthetic RNAs.** The  
417 following parameters were collected on the direct RNA nanopore sequencing data of synthetic  
418 RNAs and used to calculate the probability of identification of a <sup>5E</sup>U-labeled RNA isoform as  
419 labeled. Detectability  $d$  - the number of <sup>5E</sup>U caused mismatches in the <sup>5E</sup>U-labeled sample.  
420 Background  $b$  - the number of U caused mismatches in the unlabeled control sample. Given  
421 these parameters, the probability of identification  $p$  can be calculated as the probability of a U-  
422 based mismatch being caused by a <sup>5E</sup>U in the transcript as

$$423 \quad p = 0.25 \cdot 0.028 \cdot (d \cdot (1 - b))$$

424 with  $0.25$  - the empirical probability of U content, and labeling efficiency  $0.028$  - the empirical  
425 probability of a U being replaced by a <sup>5E</sup>U in the labeling process<sup>32</sup>. This then allows to calculate  
426 the probability of labeled RNA identification  $p^{RNA}$  as

$$427 \quad p^{RNA} = 1 - (1 - p)^{\#bases}$$

428 , the probability, that an RNA contains at least 1 detectable <sup>5E</sup>U.

429  
430 **Definition of transcription units based on the UCSC RefSeq genome assembly GRCh38**  
431 **(RefSeq-TUs).** For each annotated gene, transcription units were defined as the union of all  
432 existing inherent transcript isoforms (UCSC RefSeq GRCh38).

433



434 **Definition of isoform-independent exonic and intronic regions (constitutive exons and**  
435 **introns).** Isoform-independent exonic and intronic regions were determined using a model for  
436 constitutive exons<sup>47</sup> and constitutive introns respectively based on UCSC RefSeq annotation  
437 (GRCh38).

438  
439 **Isoform determination for human K562 cells.** The FLAIR (Full-Length Alternative Isoform  
440 analysis of RNA) algorithm<sup>22</sup> was used for the correction and isoform definition of raw human  
441 K562 direct RNA nanopore reads. Corrected and collapsed isoforms were obtained by adding  
442 short-read data (RNA-seq) to help increase splice site accuracy of the nanopore read splice  
443 junctions (<https://github.com/BrooksLabUCSC/FLAIR>).

444  
445 **Parameter collection for neural network training and classification.** For each read in each  
446 human K562 sample (<sup>5E</sup>U 60 min, Control, <sup>5E</sup>U 24 h & <sup>5E</sup>U 60 min HS) we obtained ~1500  
447 parameters from three different layers: Raw signal (ionic current), base-call event probabilities  
448 and alignment derived mismatch properties. As raw signal, 1193 parameters were gathered  
449 consisting of the raw ionic current measurements gathered for each possible 5-mer of nucleotides  
450 as well as the raw ionic current measurements gathered for each possible 3-mer centered in a 5-  
451 mer. The latter parameters were collected for U-containing and non-U-containing instances. In  
452 addition to that, raw ionic current measurements were gathered for 5-mers with all possible  
453 nucleotides in their center position also for U-containing and non-U-containing instances, as well  
454 as 5-mers exclusively leading or lagging U content. All collected raw signal parameters were z-  
455 score normalized on all non-U-containing instances given the mean values of the pore model on  
456 which the original base-calling algorithm is based provided by Oxford Nanopore Technologies.  
457 As base-call event probabilities, 120 parameters were gathered including ‘model state’, ‘move’,  
458 ‘weights’, ‘p model state’, the probability that ‘model state’ gave rise to the observation of the  
459 event, the most probable ‘model state’, the probability that ‘p model state’ gave rise to the  
460 observation of the event and the probabilities that events may be associated with the certain base  
461 from the event probabilities table provided by the base-calling algorithm. As alignment derived  
462 mismatch properties, 135 parameters were gathered including length of the reads, nucleotide

463 occurrences, number of nucleotide transitions, number of inserts and deletions on a single  
464 nucleotide basis as well as on a 5-mer basis for U-containing and non-U-containing instances.

465

466 **Neural network training, validation and classification of human RNA isoforms into <sup>5E</sup>U-**  
467 **labeled and unlabeled.** Neural network was trained on the <sup>5E</sup>U 24 h versus Control samples  
468 under the assumption that <sup>5E</sup>U 24 h sample solely contains labeled reads and the fact that the  
469 Control sample solely contains unlabeled reads. The trained neural network consists of a batch  
470 normalization layer and 3 dense layers with decreasing output shape (**Supplementary Figure**  
471 **3a**). 2 dropout layers (with 25% dropout) in between regularize the attempted classification.  
472 Training was conducted on 404.201 reads, validation was performed on 173.240 reads in 40  
473 epochs with the R interface to Keras on a TensorFlow backend <sup>48</sup>, as

474

```
475         model <- keras_model_sequential()
476         model %>%
477           layer_batch_normalization(input_shape = 1448) %>%
478           layer_dense(units = 64, activation = "relu", input_shape = 1448) %>%
479           layer_dropout(rate = 0.25) %>%
480           layer_dense(units = 8, activation = "relu") %>%
481           layer_dropout(rate = 0.25) %>%
482           layer_dense(units = 1, activation = "sigmoid")
483
484         model %>% compile(
485           optimizer = optimizer_rmsprop(),
486           loss = 'binary_crossentropy')
```

487

488 The neural network was 5-fold cross-validated with an accuracy of 0.87 and a false discovery  
489 rate (FDR) of 0.025 and used to classify reads of the <sup>5E</sup>U 60 min and <sup>5E</sup>U 60 min HS samples  
490 into <sup>5E</sup>U-labeled and unlabeled. A ROC analysis (1 – specificity vs sensitivity) for all reads of the  
491 test set showed an area under the curve (AUC) of 0.94. For reads with an alignment length larger  
492 than 500 nt and 1000 nt the AUC improved to 0.96. Note that, limiting the neural network

493 classification to reads produced in the first few hours of sequencing, i.e. reads with a generally  
494 higher accuracy, improves the AUC to 0.98.

495

496 **Random forest training, validation and classification of human RNA isoforms into <sup>5E</sup>U-**  
497 **labeled and unlabeled.** For validation purposes, a random forest <sup>49</sup> was trained on the <sup>5E</sup>U 24 h  
498 versus Control samples on the same data as the neural network above. The random forest was 5-  
499 fold cross-validated with an accuracy of 0.85 and a false discovery rate (FDR) of 0.32 and used  
500 to classify reads of the <sup>5E</sup>U 60 min sample into <sup>5E</sup>U-labeled and unlabeled.

501

502 **Poly(A)-tail length determination.** Poly(A)-tail length is estimated by identifying the dwell  
503 time of the poly(A)-tail in the nanopore. For each direct RNA nanopore sequencing read, the raw  
504 signal readout of the nanopore in pico-Ampere [pA] was extracted from the FAST5 file. Every  
505 data point above the 99.99% quantile or below the 0.001% quantile was set to the respective cut-  
506 off value for reasons of robustness (**Supplementary Figure 5c, upper panel**). Subsequently  
507 kmeans clustering was used to define two trend lines at 1/3 and 2/3 the distance between the two  
508 cluster centers. The two trend lines were then used to squish the raw data by taking the parallel  
509 minimum or maximum (**Supplementary Figure 5c, lower panel**). A loss score of a piecewise  
510 linear function of two consecutive segments of the trend lines is then used to identify segments  
511 along the squished data points (**Supplementary Figure 5c, middle panel**). The length of the  
512 third identified segment  $r_j$  is used to calculate the length of the poly(A)-tail  $l_j$  of read  $j$  in sample  
513  $i$  as

$$514 \quad l_j = \text{median}_j(s_j) \cdot \frac{r_j}{\text{hertz}_i} + 5$$

515 with the sequencing read speed  $s_j$  of read  $j$  in [nt/s] and the frequency  $\text{hertz}_i$  in [Hz] used in  
516 measuring sample  $i$  and 5 additional adenines that are concealed in the flanking 5-mers.

517

518 **Intron retention ratio.** For each RefSeq-TU (UCSC RefSeq GRCh38) the intron retention ratio  
519 for the <sup>5E</sup>U 60 min and <sup>5E</sup>U 60 min HS samples were calculated using the above defined model of  
520 constitutive exons and introns by calculating the ratio of length normalized coverages of the

521 maximum value for all respective introns and the average of all respective exons. This yielded  
522 358 gene loci with at least 5% intron retention in either of the samples.

523

524 **RNA stability (degradation rate  $\lambda_{ij}$ , half-life  $hl_{ij}$ ) and synthesis rate  $\mu_{ij}$  estimation of**  
525 **human RNA isoforms.** Each neural network classified direct RNA nanopore sequencing read of  
526 the <sup>5E</sup>U 60 min and <sup>5E</sup>U 60 min HS samples was assigned to a FLAIR defined human isoform (or  
527 RefSeq-TU) either as <sup>5E</sup>U-labeled  $L_{ij}$  and unlabeled  $T_{ij} - L_{ij}$ . The resulting counts were  
528 subsequently converted into synthesis rates  $\mu_{ij}$  and degradation rates  $\lambda_{ij}$  for isoform  $i$  in sample  
529  $j$  assuming first-order kinetics as in <sup>24</sup> using the following equations:

530 
$$\lambda_{ij} = -\alpha_j - \frac{1}{t} \cdot \log(1 - L_{ij}/T_{ij})$$

531 
$$\mu_{ij} = T_{ij}(\alpha_j + \lambda_{ij})$$

532 where  $t$  is the labeling duration in minutes and  $\alpha$  is the growth rate (dilution rate, i.e. the  
533 reduction of concentration due to the increase of cell volume during growth) defined as

534 
$$\alpha_j = \frac{\log(2)}{CCL_j}$$

535 with cell cycle length  $CCL_j$  [min]. The half-life  $hl_{ij}$  for isoform  $i$  in sample  $j$  can thus be  
536 calculated as

537 
$$hl_{ij} = \frac{\log(2)}{\lambda_{ij}}$$

538 in minutes [min].

539

540 **RNA-seq data preprocessing and antisense bias correction.** Paired-end 75 base reads with  
541 additional 6 base reads of barcodes were obtained for each of the samples (**Supplementary**  
542 **Table 1**). Reads were demultiplexed and mapped with STAR 2.3.0 <sup>50</sup> to the hg20/hg38  
543 (GRCh38) genome assembly (Human Genome Reference Consortium). Samtools <sup>46</sup> was used to  
544 quality filter SAM files, whereby alignments with MAPQ smaller than 7 (-q 7) were skipped and  
545 only proper pairs (-f2) were selected. Further data processing was carried out using the

546 R/Bioconductor environment. We used a spike-in (RNAs) normalization strategy essentially as  
547 described<sup>26</sup> to allow observation of antisense bias ratio  $c_j$  (ratio of spurious reads originating  
548 from the opposite strand introduced by the reverse transcription reaction). Antisense bias ratios  
549 were calculated for each sample  $j$  according to

$$550 \quad c_j = \operatorname{median}_i \left( \frac{k_{ij}^{\text{antisense}}}{k_{ij}^{\text{sense}}} \right)$$

551 for all available spike-ins  $i$ . Read counts ( $k_{ij}$ ) for spike-ins were calculated using HTSeq<sup>51</sup>. The  
552 number of transcribed bases ( $tb_j$ ) for all samples was calculated as the sum of the coverage of  
553 evident (sequenced) fragment parts (read pairs only) for all fragments in addition to the sum of  
554 the coverage of non-evident fragment parts for fragments with an inner mate interval not entirely  
555 overlapping a Refseq annotated intron (UCSC RefSeq GRCh38). The number of transcribed  
556 bases ( $tb_j$ ) or read counts ( $k_j$ ) for all features (RefSeq-TUs) were corrected for antisense bias  $c_j$  as  
557 follows using the parameter calculated as described above. The real number of read counts or  
558 coverage  $s_{ij}$  for transcribed unit  $i$  in sample  $j$  was calculated as

$$559 \quad s_{ij} = \frac{S_{ij} - c_j A_{ij}}{1 - c_j^2}$$

560 where  $S_{ij}$  and  $A_{ij}$  are the observed numbers of read counts or coverage on the sense and antisense  
561 strand. RPKs were calculated upon antisense bias corrected read counts ( $k_j$ ) falling into the  
562 region of a RefSeq-TU divided by its length in kilobases. Coverages were calculated upon  
563 antisense bias corrected number of transcribed bases ( $tb_j$ ) falling into the region of a RefSeq-TU  
564 divided by its length in bases.

565

## 566 References

- 567 1 Chen, Y. *et al.* Principles for RNA metabolism and alternative transcription initiation  
568 within closely spaced promoters. *Nat Genet* **48**, 984-994, doi:10.1038/ng.3616 (2016).
- 569 2 Core, L. J. *et al.* Analysis of nascent RNA identifies a unified architecture of initiation  
570 regions at mammalian promoters and enhancers. *Nat Genet* **46**, 1311-1320,  
571 doi:10.1038/ng.3142 (2014).
- 572 3 Pelechano, V., Wei, W. & Steinmetz, L. M. Extensive transcriptional heterogeneity  
573 revealed by isoform profiling. *Nature* **497**, 127-131, doi:10.1038/nature12121 (2013).
- 574 4 Turner, R. E., Pattison, A. D. & Beilharz, T. H. Alternative polyadenylation in the  
575 regulation and dysregulation of gene expression. *Semin Cell Dev Biol* **75**, 61-69,  
576 doi:10.1016/j.semcdb.2017.08.056 (2018).
- 577 5 Garalde, D. R. *et al.* Highly parallel direct RNA sequencing on an array of nanopores.  
578 *Nat Methods*, doi:10.1038/nmeth.4577 (2018).
- 579 6 Tilgner, H. *et al.* Comprehensive transcriptome analysis using synthetic long-read  
580 sequencing reveals molecular co-association of distant splicing events. *Nat Biotechnol*  
581 **33**, 736-742, doi:10.1038/nbt.3242 (2015).
- 582 7 Li, Y. I. *et al.* RNA splicing is a primary link between genetic variation and disease.  
583 *Science* **352**, 600-604, doi:10.1126/science.aad9417 (2016).
- 584 8 Long, C. *et al.* Correction of diverse muscular dystrophy mutations in human engineered  
585 heart muscle by single-site genome editing. *Sci Adv* **4**, eaap9004,  
586 doi:10.1126/sciadv.aap9004 (2018).
- 587 9 Eswaran, J. *et al.* RNA sequencing of cancer reveals novel splicing alterations. *Sci Rep* **3**,  
588 1689, doi:10.1038/srep01689 (2013).
- 589 10 Mayr, C. Regulation by 3'-Untranslated Regions. *Annu Rev Genet* **51**, 171-194,  
590 doi:10.1146/annurev-genet-120116-024704 (2017).
- 591 11 Falcone, C. & Mazzoni, C. RNA stability and metabolism in regulated cell death, aging  
592 and diseases. *FEMS Yeast Res* **18**, doi:10.1093/femsyr/foy050 (2018).
- 593 12 Houseley, J. & Tollervey, D. The many pathways of RNA degradation. *Cell* **136**, 763-  
594 776, doi:10.1016/j.cell.2009.01.019 (2009).
- 595 13 Yamaguchi, T. *et al.* The CCR4-NOT deadenylase complex controls Atg7-dependent cell  
596 death and heart function. *Sci Signal* **11**, doi:10.1126/scisignal.aan3638 (2018).

- 597 14 Jacob, A. G. & Smith, C. W. J. Intron retention as a component of regulated gene  
598 expression programs. *Hum Genet* **136**, 1043-1057, doi:10.1007/s00439-017-1791-x  
599 (2017).
- 600 15 Steijger, T. *et al.* Assessment of transcript reconstruction methods for RNA-seq. *Nat*  
601 *Methods* **10**, 1177-1184, doi:10.1038/nmeth.2714 (2013).
- 602 16 Chang, H., Lim, J., Ha, M. & Kim, V. N. TAIL-seq: genome-wide determination of  
603 poly(A) tail length and 3' end modifications. *Mol Cell* **53**, 1044-1052,  
604 doi:10.1016/j.molcel.2014.02.007 (2014).
- 605 17 Subtelny, A. O., Eichhorn, S. W., Chen, G. R., Sive, H. & Bartel, D. P. Poly(A)-tail  
606 profiling reveals an embryonic switch in translational control. *Nature* **508**, 66-71,  
607 doi:10.1038/nature13007 (2014).
- 608 18 Zhang, Z. *et al.* Deep-learning augmented RNA-seq analysis of transcript splicing. *Nat*  
609 *Methods* **16**, 307-310, doi:10.1038/s41592-019-0351-9 (2019).
- 610 19 Tapial, J. *et al.* An atlas of alternative splicing profiles and functional associations reveals  
611 new regulatory programs and genes that simultaneously express multiple major isoforms.  
612 *Genome Res* **27**, 1759-1768, doi:10.1101/gr.220962.117 (2017).
- 613 20 Xu, H., Fair, B. J., Dwyer, Z. W., Gildea, M. & Pleiss, J. A. Detection of splice isoforms  
614 and rare intermediates using multiplexed primer extension sequencing. *Nat Methods* **16**,  
615 55-58, doi:10.1038/s41592-018-0258-x (2019).
- 616 21 Clark, M. *et al.* Long-read sequencing reveals the splicing profile of the calcium channel  
617 gene CACNA1C in human brain. *bioRxiv*, 260562, doi:10.1101/260562 (2018).
- 618 22 Tang, A. D. *et al.* Full-length transcript characterization of *SF3B1* mutation  
619 in chronic lymphocytic leukemia reveals downregulation of retained introns. *bioRxiv*  
620 (2018).
- 621 23 Dolken, L. *et al.* High-resolution gene expression profiling for simultaneous kinetic  
622 parameter analysis of RNA synthesis and decay. *RNA* **14**, 1959-1972,  
623 doi:10.1261/rna.1136108 (2008).
- 624 24 Miller, C. *et al.* Dynamic transcriptome analysis measures rates of mRNA synthesis and  
625 decay in yeast. *Mol Syst Biol* **7**, 458, doi:10.1038/msb.2010.112 (2011).



- 626 25 Rabani, M. *et al.* Metabolic labeling of RNA uncovers principles of RNA production and  
627 degradation dynamics in mammalian cells. *Nat Biotechnol* **29**, 436-442,  
628 doi:10.1038/nbt.1861 (2011).
- 629 26 Schwalb, B. *et al.* TT-seq maps the human transient transcriptome. *Science* **352**, 1225-  
630 1228, doi:10.1126/science.aad9841 (2016).
- 631 27 Herzog, V. A. *et al.* Thiol-linked alkylation of RNA to assess expression dynamics. *Nat*  
632 *Methods* **14**, 1198-1204, doi:10.1038/nmeth.4435 (2017).
- 633 28 Schofield, J. A., Duffy, E. E., Kiefer, L., Sullivan, M. C. & Simon, M. D. TimeLapse-  
634 seq: adding a temporal dimension to RNA sequencing through nucleoside recoding. *Nat*  
635 *Methods* **15**, 221-225, doi:10.1038/nmeth.4582 (2018).
- 636 29 Shendure, J. *et al.* DNA sequencing at 40: past, present and future. *Nature* **550**, 345-353,  
637 doi:10.1038/nature24286 (2017).
- 638 30 Clark, M. W., T.; Garcia-Bea, A.; Kleinman, J.; Hyde, T.; Weinberger, D.; Haerty, W.;  
639 Tunbridge, E. Long-read sequencing reveals the splicing profile of the calcium channel  
640 gene CACNA1C in human brain. *bioRxiv* **10.1101/260562**,  
641 doi:<https://doi.org/10.1101/260562> (2018).
- 642 31 Garalde, D. R. *et al.* Highly parallel direct RNA sequencing on an array of nanopores.  
643 *bioRxiv*, doi:10.1101/068809 (2016).
- 644 32 Jao, C. Y. & Salic, A. Exploring RNA transcription and turnover in vivo by using click  
645 chemistry. *Proc Natl Acad Sci U S A* **105**, 15779-15784, doi:10.1073/pnas.0808480105  
646 (2008).
- 647 33 Abe, K. *et al.* Analysis of interferon-beta mRNA stability control after poly(I:C)  
648 stimulation using RNA metabolic labeling by ethynyluridine. *Biochem Biophys Res*  
649 *Commun* **428**, 44-49, doi:10.1016/j.bbrc.2012.09.144 (2012).
- 650 34 Bharmal, H., Clarke, S., Lemire, A., Agnew, B. & Kumar, K. Capture and Analysis of  
651 Newly Synthesized RNA A Novel Enabling Technology to Study High Resolution Gene  
652 Expression. *Journal of Biomolecular Techniques : JBT* **21**, S43-S43 (2010).
- 653 35 Rissland, O. S. The organization and regulation of mRNA-protein complexes. *Wiley*  
654 *Interdiscip Rev RNA* **8**, doi:10.1002/wrna.1369 (2017).
- 655 36 Theodorakis, N. G., Zand, D. J., Kotzbauer, P. T., Williams, G. T. & Morimoto, R. I.  
656 Hemin-induced transcriptional activation of the HSP70 gene during erythroid maturation

- 657 in K562 cells is due to a heat shock factor-mediated stress response. *Mol Cell Biol* **9**,  
658 3166-3173 (1989).
- 659 37 Sistonen, L., Sarge, K. D., Phillips, B., Abravaya, K. & Morimoto, R. I. Activation of  
660 heat shock factor 2 during hemin-induced differentiation of human erythroleukemia cells.  
661 *Mol Cell Biol* **12**, 4104-4111 (1992).
- 662 38 Mathew, A., Mathur, S. K. & Morimoto, R. I. Heat shock response and protein  
663 degradation: regulation of HSF2 by the ubiquitin-proteasome pathway. *Mol Cell Biol* **18**,  
664 5091-5098 (1998).
- 665 39 Niskanen, E. A. *et al.* Global SUMOylation on active chromatin is an acute heat stress  
666 response restricting transcription. *Genome Biol* **16**, 153, doi:10.1186/s13059-015-0717-y  
667 (2015).
- 668 40 Vihervaara, A. *et al.* Transcriptional response to stress in the dynamic chromatin  
669 environment of cycling and mitotic cells. *Proc Natl Acad Sci U S A* **110**, E3388-3397,  
670 doi:10.1073/pnas.1305275110 (2013).
- 671 41 Vihervaara, A. *et al.* Transcriptional response to stress is pre-wired by promoter and  
672 enhancer architecture. *Nat Commun* **8**, 255, doi:10.1038/s41467-017-00151-0 (2017).
- 673 42 Shalgi, R., Hurt, J. A., Lindquist, S. & Burge, C. B. Widespread inhibition of  
674 posttranscriptional splicing shapes the cellular transcriptome following heat shock. *Cell*  
675 *Rep* **7**, 1362-1370, doi:10.1016/j.celrep.2014.04.044 (2014).
- 676 43 Mahat, D. B. & Lis, J. T. Use of conditioned media is critical for studies of regulation in  
677 response to rapid heat shock. *Cell Stress Chaperones* **22**, 155-162, doi:10.1007/s12192-  
678 016-0737-x (2017).
- 679 44 Sovic, I. *et al.* Fast and sensitive mapping of nanopore sequencing reads with GraphMap.  
680 *Nat Commun* **7**, 11307, doi:10.1038/ncomms11307 (2016).
- 681 45 Li, H. Minimap2: pairwise alignment for nucleotide sequences. *Bioinformatics* **34**, 3094-  
682 3100, doi:10.1093/bioinformatics/bty191 (2018).
- 683 46 Li, H. *et al.* The Sequence Alignment/Map format and SAMtools. *Bioinformatics* **25**,  
684 2078-2079, doi:10.1093/bioinformatics/btp352 (2009).
- 685 47 Bullard, J. H., Purdom, E., Hansen, K. D. & Dudoit, S. Evaluation of statistical methods  
686 for normalization and differential expression in mRNA-Seq experiments. *BMC*  
687 *Bioinformatics* **11**, 94, doi:10.1186/1471-2105-11-94 (2010).

688 48 keras: R Interface to 'Keras' (2018).  
689 49 Classification and Regression by randomForest (2002).  
690 50 Dobin, A. & Gingeras, T. R. Mapping RNA-seq Reads with STAR. *Curr Protoc*  
691 *Bioinformatics* **51**, 11 14 11-19, doi:10.1002/0471250953.bi1114s51 (2015).  
692 51 Anders, S., Pyl, P. T. & Huber, W. HTSeq--a Python framework to work with high-  
693 throughput sequencing data. *Bioinformatics* **31**, 166-169,  
694 doi:10.1093/bioinformatics/btu638 (2015).  
695 52 Robinson, J. T. *et al.* Integrative genomics viewer. *Nat Biotechnol* **29**, 24-26,  
696 doi:10.1038/nbt.1754 (2011).  
697  
698

## 699 **Acknowledgments**

700 We would like to thank Johannes Söding, Christian Roth and Dmitry Tegunov (Max Planck  
701 Institute for Biophysical Chemistry) for advice on machine learning aspects. We would also like  
702 to thank Nikolaos Papadopoulos and Noah Wulff Mottelson (Max Planck Institute for  
703 Biophysical Chemistry) for help with python. In addition, we would like to thank Michael  
704 Lidschreiber (Max Planck Institute for Biophysical Chemistry) and Brian Lee (UCSC Genomics  
705 Institute) for help with the UCSC Genome Browser Track Hub. Moreover, we would like to  
706 thank Anna Sawicka and Kristina Žumer (Max Planck Institute for Biophysical Chemistry) for  
707 sharing the pUC19 spike-in plasmids. PC was supported by the Deutsche  
708 Forschungsgemeinschaft (SFB860, SPP1935), the European Research Council Advanced  
709 Investigator Grant TRANSREGULON (grant agreement No 693023), and the Volkswagen  
710 Foundation.

711

## 712 **Competing interests**

713 The authors declare that no competing interests exist.

714

## 715 **Authors' contributions**

716 KM, BS and SG carried out experiments. BS designed and carried out all bioinformatics  
717 analysis. BS conceptualized, designed and supervised research. BS and PC prepared the  
718 manuscript, with input from all authors.

719

720 **Figures**

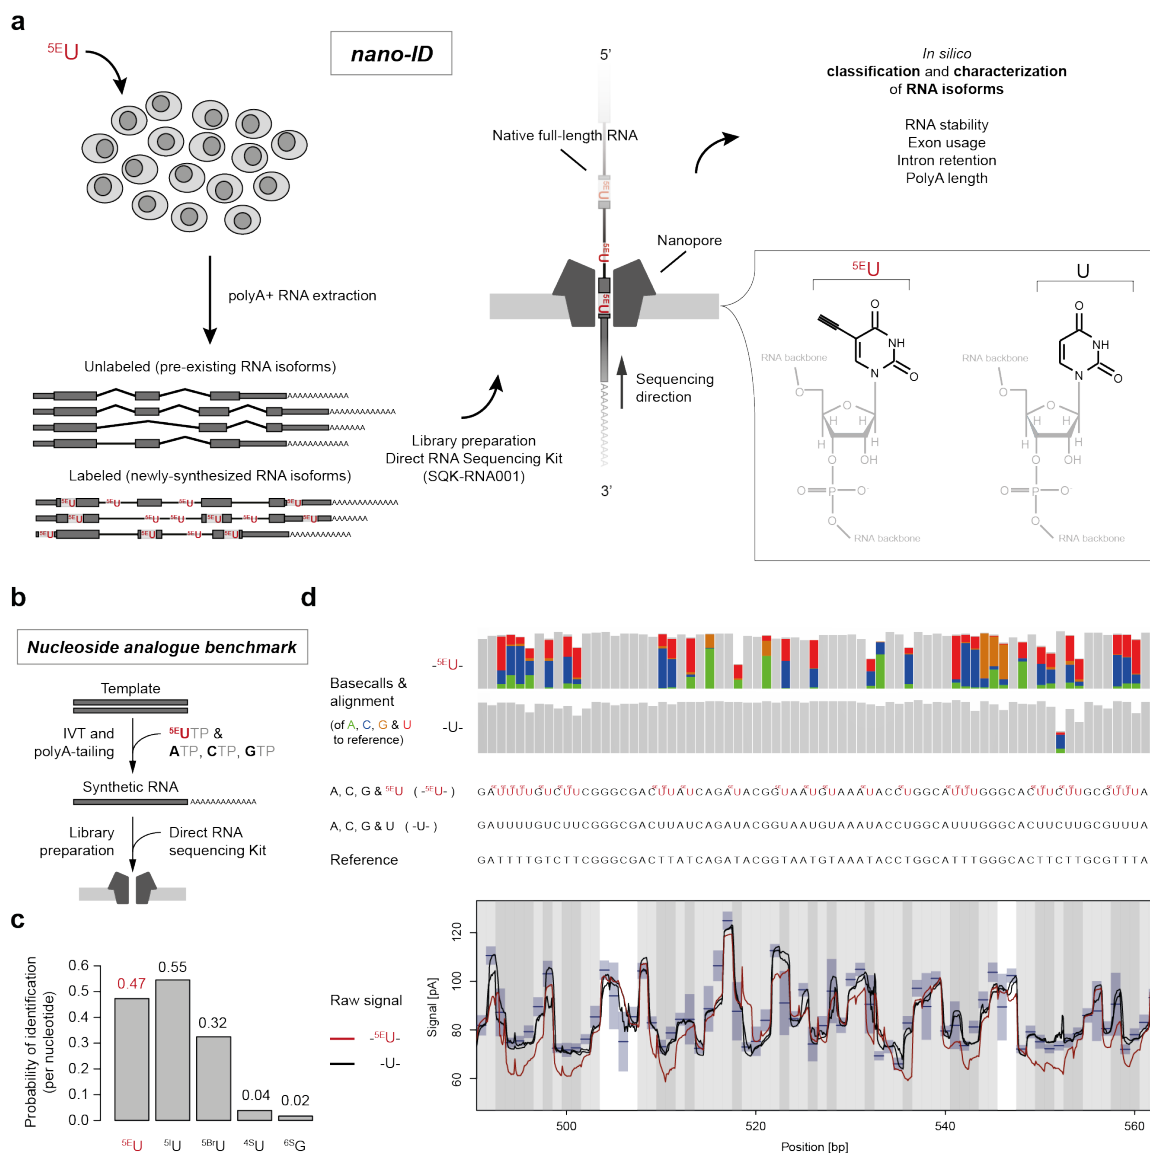

721

722 **Figure 1. Nanopore sequencing-based Isoform Dynamics (nano-ID) combines metabolic**

723 **RNA labeling with ‘long-read’ nanopore sequencing of native RNA molecules. (a)**

724 **Experimental schematic of <sup>5E</sup>U-labeled RNA isoforms subjected to direct RNA ‘long-read’**

725 **nanopore sequencing. Metabolic labeling of human K562 cells with the nucleoside analogue 5-**

726 **Ethynyluridine (<sup>5E</sup>U) *in vivo*. Newly-synthesized RNA isoforms will incorporate <sup>5E</sup>U instead of**

727 **standard uridine (U) residues. This allows to distinguish the newly synthesized RNA isoforms**

728 **(Labeled) from pre-existing RNA isoforms (Unlabeled) *in silico* after sequencing the native full-**

729 **length molecules on an array of nanopores <sup>5</sup>. <sup>5E</sup>U containing RNA isoforms are computationally**

730 traceable and thus allow classification. Identification and quantification of RNA isoforms  
731 subsequently enable assessment of RNA stability, exon usage, intron retention and polyA-tail  
732 length. (b) Experimental schematic to derive synthetic RNAs for nucleoside analogue  
733 benchmark. RNAs were *in vitro* transcribed using either the standard bases A, U, C, G as a  
734 control, or one of the natural bases was exchanged for a nucleoside analogue (shown for <sup>5E</sup>U). (c)  
735 Barplot showing the probability of nucleoside analogue identification compared to natural  
736 UTP/GTP based on base-miscalls (**Methods**) of all tested nucleoside analogues (<sup>5E</sup>U, 5-  
737 bromouridine (<sup>5Br</sup>U), 5-iodouridine (<sup>5I</sup>U), 4-thiouridine (<sup>4S</sup>U) and 6-thioguanine (<sup>6S</sup>G)). (d) Upper  
738 panel: Base miscalls (colored vertical bars) of the standard base-calling algorithm for synthetic  
739 RNAs containing <sup>5E</sup>U instead of U (-<sup>5E</sup>U-, 3.563 molecules) and synthetic control RNAs (-U-,  
740 15.840 molecules) in comparison to the original sequence (Reference) of an exemplary region on  
741 synthetic RNA ‘Spike-in 8’ (**Methods, Supplementary Table 3**). Middle panel: Synthetic RNA  
742 sequences with (-<sup>5E</sup>U-) and without <sup>5E</sup>U (-U-) depicted above the reference sequence (Reference).  
743 Lower panel: Alignment of the raw signal readout of the nanopore in pico-Ampere [pA] to the  
744 reference sequence. Synthetic control RNAs (-U-) are shown in black. <sup>5E</sup>U containing synthetic  
745 RNAs are shown in red (-<sup>5E</sup>U-). <sup>5E</sup>U containing synthetic RNAs show a clear deviation from the  
746 expected signal level in blue. Blue boxes indicate mean and standard deviation of the pore model  
747 on which the original base-calling algorithm is based.

748

749

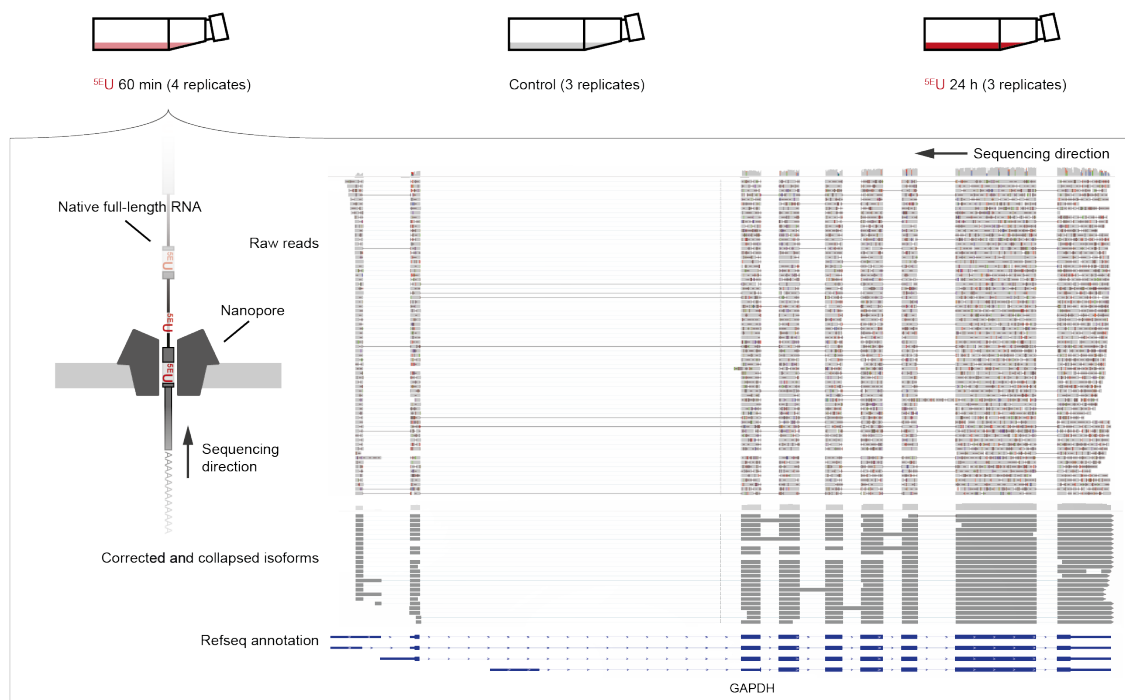

750  
751 **Figure 2. Direct RNA ‘long-read’ nanopore sequencing of <sup>5E</sup>U-labeled RNA isoforms in**  
752 **human K562 cells.** Upper panel: Illustration of the experimental set-up. Human K562 cells were  
753 cultured in the presence of the nucleoside analogue <sup>5E</sup>U for 60 minutes (<sup>5E</sup>U 60 min, 4 replicates)  
754 and 24 h (<sup>5E</sup>U 24 h, 3 replicates). Control samples were not labeled (Control, 3 replicates). Lower  
755 panel: Genome browser view of direct RNA ‘long-read’ nanopore sequencing results of the  
756 human GAPDH gene locus on chromosome 12 (~8 kbp, chr12: 6,532,405-6,540,375) visualized  
757 with the Integrative Genomics Viewer (IGV, version 2.4.10; human hg38) <sup>52</sup>. From top to  
758 bottom: raw nanopore sequencing reads (light grey, shown are typical aligned raw reads below  
759 the accumulated coverage of all measured reads), corrected and collapsed isoforms (dark grey)  
760 determined with the FLAIR algorithm <sup>22</sup> based on raw reads and RefSeq GRCh38 annotation  
761 (blue).

762

763



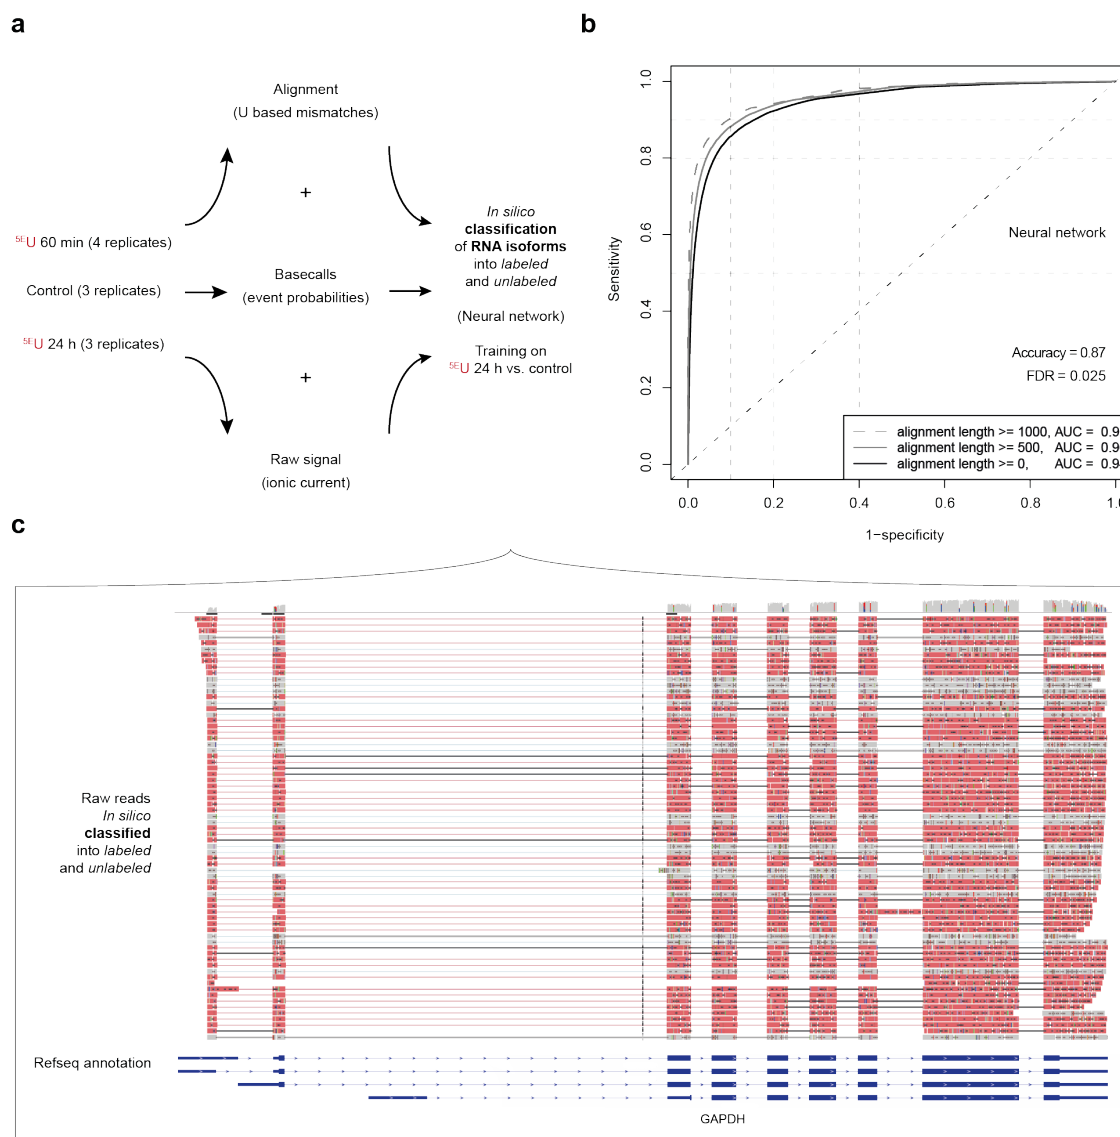

764  
 765 **Figure 3. Neural network based classification of human RNA isoforms into <sup>5E</sup>U-labeled and**  
 766 **unlabeled.** (a) Multi-layered data collection scheme. Parameter collection of human K562  
 767 samples (<sup>5E</sup>U 60 min, Control & <sup>5E</sup>U 24 h) was realized on three different layers: Raw signal  
 768 (ionic current), base-call event probabilities and alignment derived U based mismatch properties  
 769 (**Methods**). Neural network was trained on the <sup>5E</sup>U 24 h versus Control samples with an  
 770 accuracy of 0.87 and a false discovery rate (FDR) of 0.025 and used to classify reads of the <sup>5E</sup>U  
 771 60 min samples into <sup>5E</sup>U-labeled and unlabeled. (b) ROC analysis of 5-fold cross-validated  
 772 neural network training. Plot shows ROC curves (1 – specificity versus sensitivity) for all reads  
 773 of the test set (black, alignment length >=0 nt, AUC = 0.94), for reads with an alignment length

774 larger than 500 nt (grey, alignment length  $\geq 500$  nt, AUC = 0.96) and for reads with an  
775 alignment length larger than 1000 nt (dashed grey, alignment length  $\geq 1000$  nt, AUC = 0.96). (c)  
776 Genome browser view of classified direct RNA ‘long-read’ nanopore sequencing reads of the  
777 human GAPDH gene locus on chromosome 12 (~8 kbp, chr12: 6,532,405-6,540,375) visualized  
778 with the Integrative Genomics Viewer (IGV, version 2.4.10; human hg38) <sup>52</sup>. Unlabeled reads  
779 are shown in grey, <sup>5E</sup>U-labeled reads are shown in red.  
780

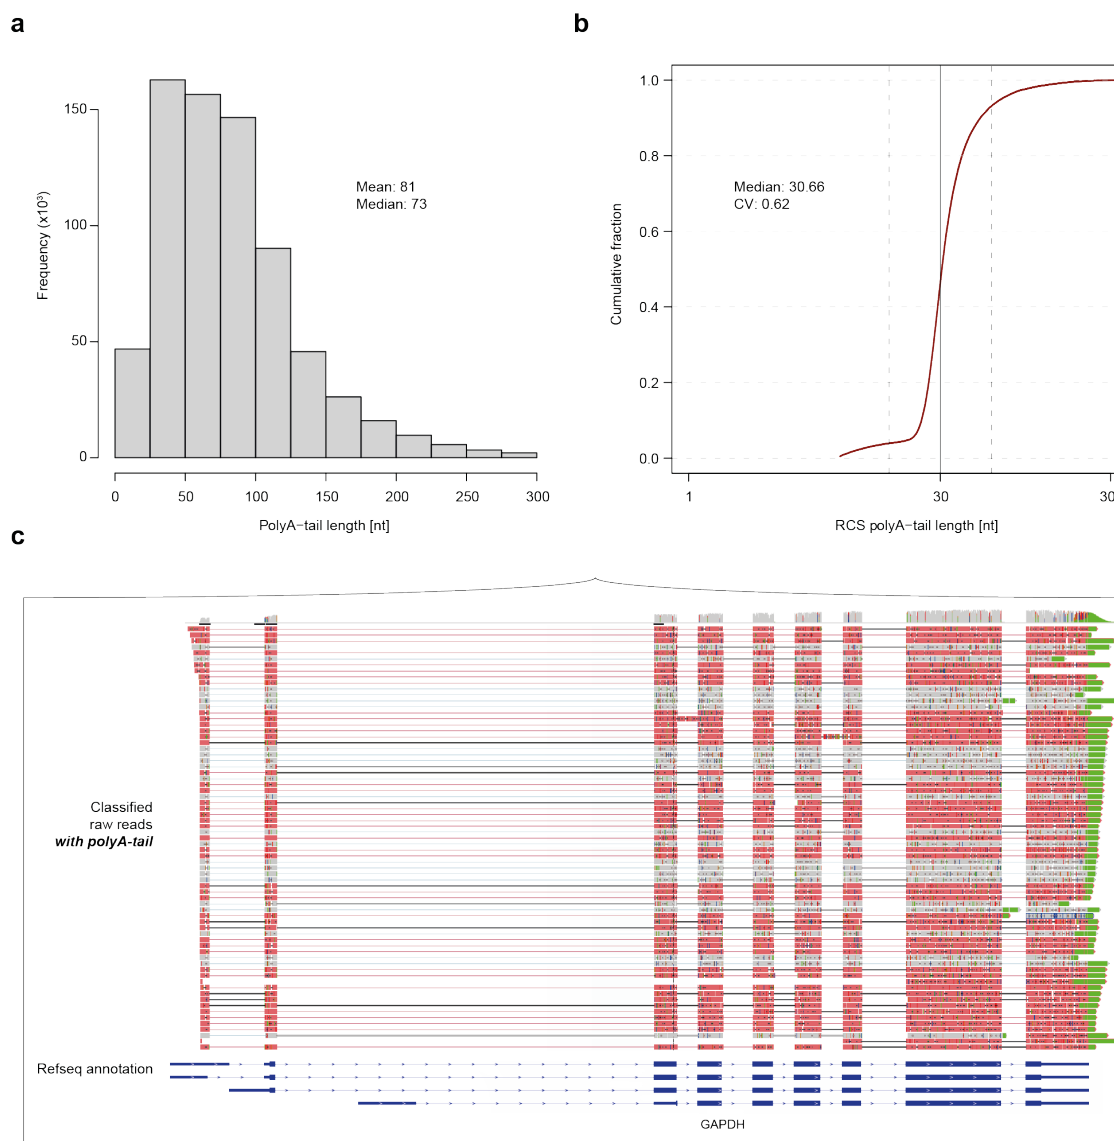

781  
782 **Figure 4. Poly(A)-tail length determination of human RNA isoforms.** (a) Histogram of  
783 poly(A)-tail length estimates of 714,536 RNA isoforms (mean: 81 nt, median: 73 nt). (b)  
784 Cumulative distribution function of poly(A)-tail length estimates of the RNA calibration strand  
785 (RCS, yeast derived spike-in RNAs that are equipped with a poly(A)-tail of exactly 30 adenines  
786 (ONT, SQK-RNA001)). Vertical solid black line indicates optimal result of 30 nt (median: 30.6,  
787 coefficient of variation: 0.62). Vertical dashed black lines indicate 2-fold in either direction. (c)  
788 Genome browser view of classified direct RNA 'long-read' nanopore sequencing reads with  
789 poly(A)-tail (green) of the human GAPDH gene locus on chromosome 12 (~8 kbp, chr12:

790 6,532,405-6,540,375) visualized with the Integrative Genomics Viewer (IGV, version 2.4.10;  
 791 human hg38)<sup>52</sup>.  
 792

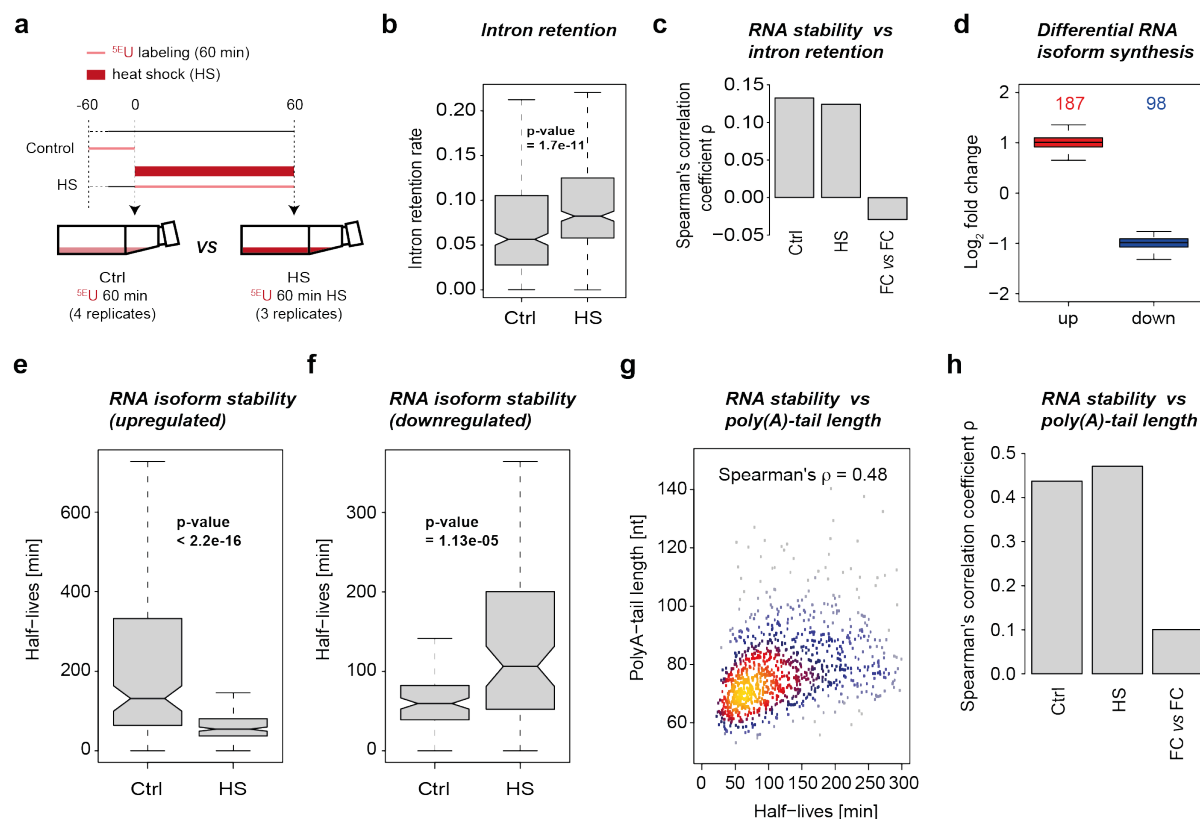

793  
 794 **Figure 5. nano-ID monitors RNA isoform dynamics during heat shock.** (a) Experimental set-  
 795 up of the heat shock treatment (60 min at 42 °C) in human K562 cells. (b) Boxplot shows intron  
 796 retention rate (**Methods**, min 5% in either condition) of 358 gene loci comparing heat shock (<sup>5E</sup>U  
 797 60 min HS) against control (<sup>5E</sup>U 60 min). (c) Bar plot shows correlation (Spearman's rank  
 798 correlation coefficient) of RNA half-lives and intron retention ratios before and after heat shock  
 799 (1,027 loci). The third bar shows the correlation of their respective folds. (d) Boxplot shows  
 800 upregulated (red) and downregulated (blue) RNA isoforms upon 60 min of heat shock (42 °C). A  
 801 minimum fold change of 1.25 and a maximum p-value of 0.1 was set for calling a significant  
 802 expression change. (e) Boxplot shows half-lives of significantly upregulated RNA isoforms  
 803 comparing heat shock (<sup>5E</sup>U 60 min HS) against the control (<sup>5E</sup>U 60 min). (f) As in (e) for  
 804 significantly downregulated RNA isoforms. (g) Scatter plot with color-coded density of RNA  
 805 half-lives and RNA poly(A)-tail lengths in both conditions. Shown are 1,230 highly expressed

806 RefSeq GRCh38 annotated genes. Correlation is calculated as Spearman's rank correlation  
807 coefficient (0.48) rounded to the second decimal. (h) As in (c) using the RNA poly(A)-tail  
808 lengths (1,230 loci).  
809

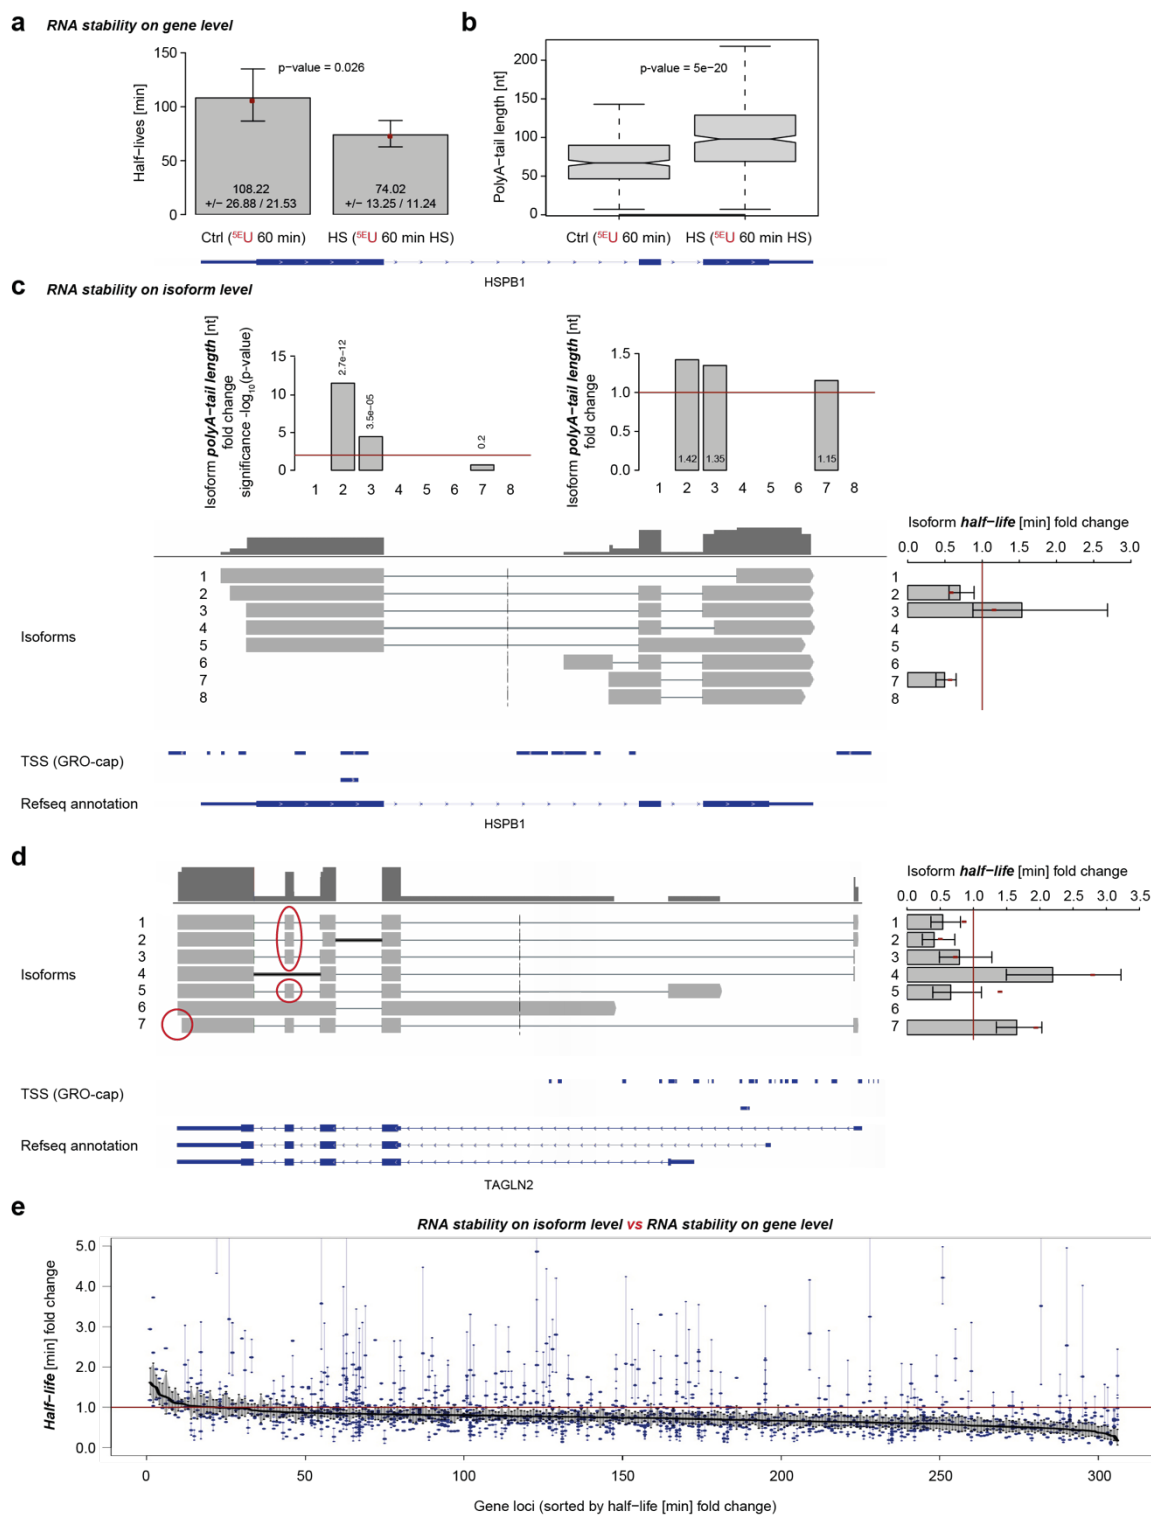

810

811 **Figure 6. nano-ID resolves the characteristics of individual RNA isoforms.** (a) Boxplot  
 812 shows half-life estimates of RNAs from the human HSPB1 gene locus (chr6:31,813,514-  
 813 31,819,942) comparing heat shock (HS, <sup>5</sup>E<sub>U</sub> 60 min HS) against control (Ctrl, <sup>5</sup>E<sub>U</sub> 60 min).

814 Standard deviation is shown as error bars. Red points depict half-life estimate of merged  
815 replicates in each condition. (b) Boxplot shows the poly(A)-tail length distributions of RNAs  
816 from the human HSPB1 gene locus. 437 RNAs from heat shocked samples (HS, <sup>5</sup>EU 60 min HS)  
817 are compared to 341 RNAs in the respective control sample (Ctrl, <sup>5</sup>EU 60 min). (c) Schematic  
818 shows direct RNA nanopore sequencing derived RNA isoforms at the human HSPB1 gene locus  
819 above annotated transcription start sites (TSSs) from published GRO-cap data generated in K562  
820 cells <sup>2</sup> and RefSeq GRCh38 annotation. Bar plots show RNA isoform half-life fold changes,  
821 poly(A)-tail length fold changes and their respective significance as standard deviation (error  
822 bars) or  $-\log_{10}(\text{p-value})$ . Red lines indicate no fold change or  $-\log_{10}(\text{p-value})$  with p-value 0.01.  
823 (d) As in (c) for RNA isoforms at the human TAGLN2 gene locus (chr1:159,916,107-  
824 159,927,542). (e) Half-life fold change (y-axis) depicted for RNAs encoded by 306 high  
825 confident gene loci (x-axis). All estimates are supported across biological replicates ( $n \geq 3$ ) and  
826 conditions ( $n=2$ ). Half-life estimates for RNA encoded by the entire gene loci (combined) are  
827 depicted as a black line (sorted in decreasing order). Blue dots represent individual RNA isoform  
828 half-life estimates at respective gene loci (1,169 isoforms in total). Perpendicular blue and black  
829 lines represent standard deviations of individual estimates. For individual RNA isoform half-life  
830 estimates, standard deviations are only shown if not overlapping with the standard deviation of  
831 the respective combined half-life estimates (black).

832
